# Supplementary material for: Effective adsorption of Congo red by a MOF-based magnetic material
Source: Royal Society of Chemistry journal article supplement (doi:10.1039/c9dt00813f), 2019-01-01
Supplement: c9dt00813f1.pdf [file c9dt00813f1.pdf]

Electronic Supplementary Material (ESI) for Dalton Trans.  
This journal is © The Royal Society of Chemistry 2019

## Supporting Information

### Supplementary data

#### Effective adsorption of Congo red by MOF-based magnetic material

Li-Juan Han,<sup>a,b</sup> Fa-Yuan Ge,<sup>a</sup> Guo-Hao Sun,<sup>a</sup> Xiang-Jing Gao<sup>a</sup> and He-Gen Zheng<sup>a\*</sup>

<sup>a</sup> *State Key Laboratory of Coordination Chemistry, School of Chemistry and Chemical Engineering, Collaborative Innovation Center of Advanced Microstructures, Nanjing University, Nanjing 210023, P. R. China*

<sup>b</sup> *Key Laboratory of Inorganic Chemistry in Universities of Shandong, Department of Chemistry and Chemical Engineering, Jining University, Qufu, 273155, P. R. China*

#### Materials and instrumentation

All reagents and solvents except BPTP ligand were commercially available and used as received without further purification. The IR absorption spectra of these complexes were recorded in the range of 400-4000 cm<sup>-1</sup> by means of a Nicolet (Impact 410) spectrometer with KBr pellets. Element analyses (C, H, N) were carried out on a Perkin-Elmer model 240C analyzer. PXRD measurements were performed on a Bruker D8 Advance X-ray diffractometer using Cu-K $\alpha$  radiation (0.15418 nm), in which the X-ray tube was operated at 40 kV and 30 mA. TG analysis was performed on a Perkin Elmer thermogravimetric analyzer from room temperature to 800 °C with a heating rate of 10 K·min<sup>-1</sup> under N<sub>2</sub> atmosphere.

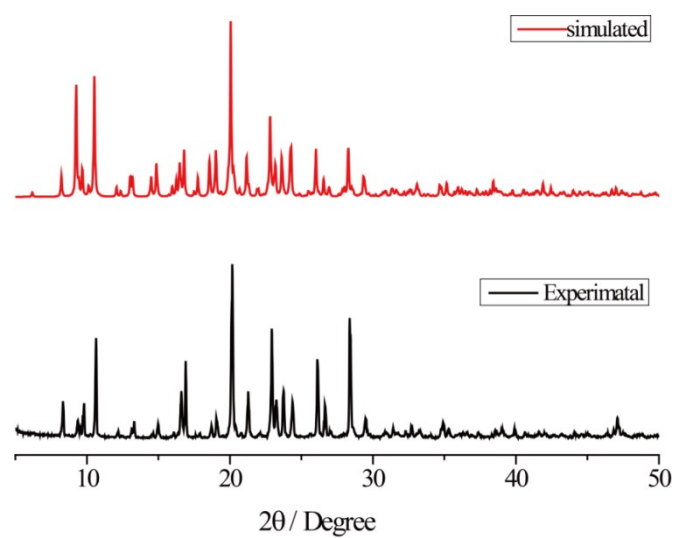

**Fig. S1.** PXRD of MOF ZTB-1.

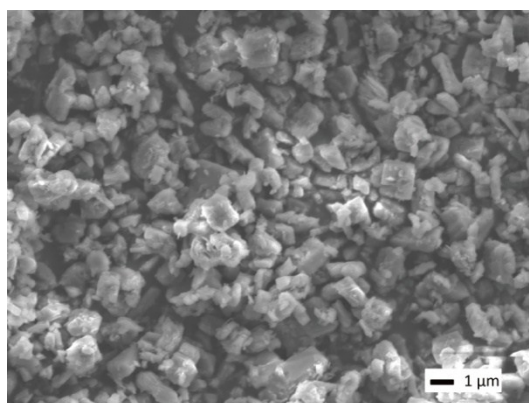

**Fig. S2.** SEM image of ZTB-1.

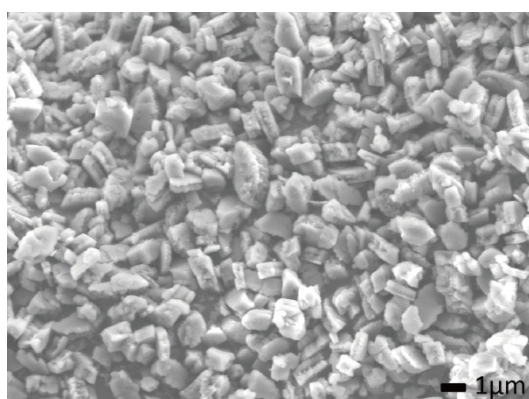

**Fig. S3.** SEM image of ZTB-1 prepared in the presence of CTAB surfactant.

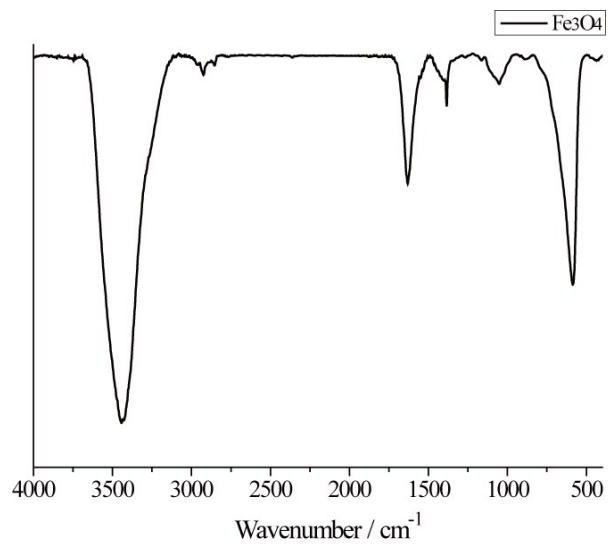

**Fig. S4.** FT-IR spectroscopy of Fe<sub>3</sub>O<sub>4</sub>.

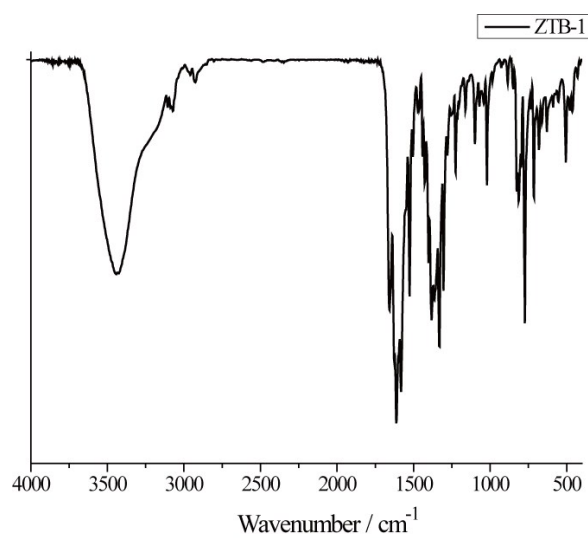

**Fig. S5.** FT-IR spectroscopy of MOF ZTB-1.

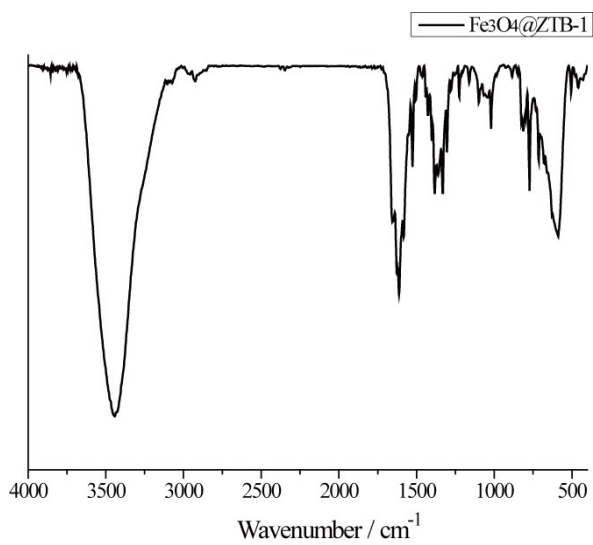

**Fig. S6.** FT-IR spectroscopy of Fe<sub>3</sub>O<sub>4</sub>@ZTB-1.

**Table S1.** Crystal data and structure refinement for ZTB-1.

| <b>ZTB-1</b>                                                              |                                                                                               |
|---------------------------------------------------------------------------|-----------------------------------------------------------------------------------------------|
| Empirical formula                                                         | C <sub>38</sub> H <sub>26</sub> N <sub>4</sub> O <sub>10</sub> S <sub>4</sub> Zn <sub>2</sub> |
| Formula weight                                                            | 957.61                                                                                        |
| Crystal color                                                             | Yellow                                                                                        |
| Crystal size (mm)                                                         | 0.15 x 0.15 x 0.12                                                                            |
| Crystal system                                                            | Monoclinic                                                                                    |
| space group                                                               | <i>P</i> 2 <sub>1</sub> / <i>c</i>                                                            |
| <i>a</i> (Å)                                                              | 9.228                                                                                         |
| <i>b</i> (Å)                                                              | 21.487                                                                                        |
| <i>c</i> (Å)                                                              | 19.316                                                                                        |
| $\alpha$ (deg)                                                            | 90                                                                                            |
| $\beta$ (deg)                                                             | 98.624                                                                                        |
| $\gamma$ (deg)                                                            | 90                                                                                            |
| Volume (Å <sup>3</sup> )                                                  | 3787.0                                                                                        |
| <i>Z</i>                                                                  | 4                                                                                             |
| $d_{\text{calcd}}$ (g/cm <sup>3</sup> )                                   | 1.683                                                                                         |
| $\mu$ (mm <sup>-1</sup> )                                                 | 1.553                                                                                         |
| <i>F</i> (000)                                                            | 1952                                                                                          |
| $\lambda$ (Å)                                                             | 0.71073                                                                                       |
| Temperature                                                               | 293(2) K                                                                                      |
| $\theta$ range (deg)                                                      | 1.43 to 25.00                                                                                 |
| <i>h</i> , <i>k</i> , <i>l</i> range                                      | -10 ≤ <i>h</i> ≤ 10<br>-25 ≤ <i>k</i> ≤ 14<br>-22 ≤ <i>l</i> ≤ 22                             |
| Reflections collected / unique                                            | 21050 / 6650<br>[ <i>R</i> (int) = 0.0261                                                     |
| Completeness to $\theta$                                                  | 100.0 % ( $\theta = 25$ )                                                                     |
| Data / restraints / parameters                                            | 6650 / 87 / 560                                                                               |
| Goodness-of-fit on <i>F</i> <sup>2</sup>                                  | 1.038                                                                                         |
| Final <i>R</i> indices [ <i>I</i> > 2 $\sigma$ ( <i>I</i> )] <sup>b</sup> | <i>R</i> <sub>1</sub> = 0.0253<br><i>wR</i> <sub>2</sub> = 0.0608                             |
| <i>R</i> indices (all data)                                               | <i>R</i> <sub>1</sub> = 0.0330<br><i>wR</i> <sub>2</sub> = 0.0644                             |
| Largest diff. Peak<br>and hole (e <sup>-</sup> ·Å <sup>-3</sup> )         | 0.294<br>and -0.236                                                                           |

<sup>b</sup>  $R_1 = \sum ||F_o| - |F_c|| / \sum |F_o|$ ;  $wR_2 = [\sum w(F_o^2 - F_c^2)^2 / \sum wF_o^4]^{1/2}$

**Table S2.** Selected bond lengths (Å) and angles (°) for ZTB-1.

|                     |            |
|---------------------|------------|
| Zn(1)-O(4)          | 1.9744(15) |
| Zn(1)-O(5)#1        | 1.9851(17) |
| Zn(1)-O(8)          | 2.071(5)   |
| Zn(1)-N(3)#2        | 2.0742(18) |
| Zn(1)-O(9')         | 2.112(13)  |
| Zn(1)-O(8')         | 2.346(12)  |
| <hr/>               |            |
| O(4)-Zn(1)-O(5)#1   | 113.06(7)  |
| O(4)-Zn(1)-O(8)     | 92.42(13)  |
| O(5)#1-Zn(1)-O(8)   | 95.26(18)  |
| O(4)-Zn(1)-N(3)#2   | 104.17(7)  |
| O(5)#1-Zn(1)-N(3)#2 | 118.31(7)  |
| O(8)-Zn(1)-N(3)#2   | 131.04(19) |
| O(4)-Zn(1)-O(9')    | 105.0(2)   |
| O(5)#1-Zn(1)-O(9')  | 126.1(2)   |
| N(3)#2-Zn(1)-O(9')  | 85.8(3)    |
| O(4)-Zn(1)-O(8')    | 90.2(3)    |
| O(5)#1-Zn(1)-O(8')  | 83.2(3)    |
| N(3)#2-Zn(1)-O(8')  | 144.8(4)   |

Symmetry transformations used to generate equivalent atoms:

#1:  $x, -y+3/2, z-1/2$ ,    #2:  $-x+1, y+1/2, -z+3/2$
